# Supplementary material for: Rule discovery and distance separation to detect reliable miRNA biomarkers for the diagnosis of lung squamous cell carcinoma
Source: PubMed Central journal article supplement (PMC4290601; doi:10.1186/1471-2164-15-s9-s16), 2014-12-08
Supplement: 1471-2164-15-S9-S16-S1.pdf [file 1471-2164-15-S9-S16-S1.pdf]

# Rule discovery and distance separation to detect reliable miRNA biomarkers for the diagnosis of lung squamous cell carcinoma --- supplementary file

Renhua Song<sup>1</sup>, Qian Liu<sup>1</sup>, Gyorgy Hutvagner<sup>2</sup>, Hung Nguyen<sup>2</sup>, Kotagiri Ramamohanarao<sup>3</sup>, Limsoon Wong<sup>4</sup>, Jinyan Li<sup>1\*</sup>

<sup>1</sup>Advanced Analytics Institute, Faculty of Engineering and IT, University of Technology, Sydney, NSW 2007, Australia.

<sup>2</sup>Centre for Health Technologies, Faculty of Engineering and IT, University of Technology, Sydney, NSW 2007, Australia.

<sup>3</sup>Dept. of Computing and Information Systems, the University of Melbourne, Vic 3010, Australia.

<sup>4</sup>School of Computing, National University of Singapore, Singapore 117417, Singapore.

## Experiment Information

**Information gain ratio.** In this work, we employed information gain ratio [25]. Let Attr be the set of all attributes and Ex the set of all training examples,  $value(x, a)$  defines the value of a specific example  $x$  for attribute  $a$ , where  $x \in EX$ , and  $a \in Attr$  and  $H(x) = E[\log(2, 1/p(x_i))] = -\sum p(x_i)\log(2, p(x_i))$  ( $i = 1, 2, \dots, n$ ) specifies the entropy. The information gain for attribute  $a \in Attr$  is defined as follows:

$$IG(Ex, a) = H(Ex) - \sum_{v \in values(a)} \frac{|\{x \in Ex \mid value(x, a) = v\}|}{|Ex|} \cdot H(\{x \in Ex \mid value(x, a) = v\}) \quad (1)$$

The information gain is equal to the total entropy for an attribute if for each of the attribute values a unique classification can be made for the result attribute. In this case the relative entropies subtracted from the total entropy are 0. The intrinsic value for a test is defined as follows:

$$IV(Ex, a) = - \sum_{v \in value(a)} \frac{|\{x \in Ex \mid value(x, a) = v\}|}{|Ex|} * \log_2\left(\frac{|\{x \in Ex \mid value(x, a) = v\}|}{|Ex|}\right) \quad (2)$$

The information gain ratio is just the ratio between the information gain and the intrinsic value:

$$IGR(Ex, a) = IG / IV \quad (3)$$

Information gain ratio biases the decision tree against considering attributes with a large number of distinct values. So it solves the drawback of information gain—namely, information gain applied to attributes that can take on a large number of distinct values might learn the training set too well.

**Calculation of Euclidean distance.** The Euclidean distance or Euclidean metric is the “ordinary” distance between two points that one would measure with a ruler, and is given by the Pythagorean formula [16, 17]. The Euclidean distance between point  $p$  and  $q$  is the length of the line segment connecting them.

In Cartesian coordinates, if  $p = (p_1, p_2 \dots p_n)$  and  $q = (q_1, q_2 \dots q_n)$  are two points in Euclidean  $n$ -space, then the distance from  $p$  to  $q$ , or from  $q$  to  $p$  is given by:

$$d(p, q) = d(q, p) = \sqrt{(q_1 - p_1)^2 + (q_2 - p_2)^2 + \dots + (q_n - p_n)^2} = \sqrt{\sum_{i=1}^n (q_i - p_i)^2}. \quad (4)$$

In this work, we just use two dimensions to calculate the distance, so  $p = (p_1, p_2)$  and  $q = (q_1, q_2)$  then the distance is given by

$$d(p, q) = \sqrt{(p_1 - q_1)^2 + (p_2 - q_2)^2}. \quad (5)$$

### *Source code of the algorithm constructing a committee of decision trees*

Input: data.txt, a 71x329 relational table.

Output: DTc, a committee of 2- or 3- miRNAs' decision trees with 100% accuracy; nrule, the number of selected decision trees; myoutput.txt, all the contents printed in the screen; mygraphs.pdf, pictures of all the selected decision trees.

```
sink("myoutput.txt",append=TRUE, split=TRUE); # save the contents of the screen
pdf("mygraphs.pdf"); # save the output pictures

rm(list=ls());

library(RWeka); #load RWeka

library(stringr); #load String

library(gplots); #load Plot

d<-read.table("data.txt",sep="\t"); # load data from a file

g<-GainRatioAttributeEval(V329~.,data=d); # rank the miRNAs by gain ratio

t=19; # choose the top-ranked 19 miRNAs after mapping the 5 plasma biomarkers

i<-order(g,decreasing=T)[1:t];

i<-c(i,length(d)) # add the column of class label to the new dataset

n<-d[,i]; # obtain a new dataset

nrule<-0; # number of rules

q<-length(i)-1; # the times of constructiong decisions

for (c in 1:q){ # the procedure continues until only two miRNAs left

  DTc<-J48(V329~.,data=n); # use C4.5 to construct a decision tree

  bc<-summary(DTc)$details["pctCorrect"][[1]]; # the accuracy of the decision tree

# JUSTIFY THE ACCURACY OF THE DECISION TREE

  if(bc==100) # if the accuracy equals 100%, then print and draw the decision tree
  {

    # JUSTIFY THE NUMBER OF NODES IN THE DECISION TREE

    str<-DTc$classifier$string(); # the string structure of the decision tree

    str1<-strsplit(str, "<"); # split the string, str1 is a list

    str2<-unlist(str1); # transfer a list to a character

    l<-length(str2); # the length of the character

    id<-seq(1,328,1); id=0;
```

```

for (i in 1:(l-1)){
  st<-str2[i];

  ll<-nchar(st,type="chars",allowNA=FALSE); # the length of a character

  nst<-substr(st,ll-3,ll); # choose the last four chars

  nst1<-strsplit(nst,"V"); # separate the character in V

  num<-nst1[[1]][2];

  num<-as.numeric(num);

  id[i]=num; # the ID of node in the decision tree
}

node<-length(unique(id)); # the number of nodes in the decision tree

if (node<4){
  plot(DTc);

  nrule<-nrule+1;
}

}

dtcstr<-DTc$classifier$string(); # select the root of a decision tree
s1<-strsplit(dtcstr,"J48 pruned tree\n-----\n\n");
s2<-strsplit(s1[[1]][2]," <");
s3<-s2[[1]][1];

#s<-as.numeric(s3);

#s3<-str_trim(s3);

if(is.na(s3)=="TRUE"){
  n[,-1];
}

else{

  n[,eval(s3)]<-NULL; # remove the column of the root
}

```

```
}
```

```
print(sprintf("The number of selected decision trees is %d", nrule));
```

```
sink();
```

```
dev.off();
```
